# Supplementary material for: Serum Concentrations of Ischaemia-Modified Albumin in Acute Coronary Syndrome: A Systematic Review and Meta-Analysis
Source: MDPI journal article supplement (doi:10.3390/jcm11144205), 2022-07-20
Supplement: s1 [file s1]

**Supplementary Table S3.** The Joanna Briggs Institute critical appraisal checklist.

| Study                    | Were the criteria for inclusion clearly defined? | Were the subjects and the setting described in detail? | Was the exposure measured in a valid and reliable way? | Were objective, standard criteria used for measurement of the condition? | Were confounding factors identified? | Were strategies to deal with confounding factors stated? | Were the outcomes measured in a valid and reliable way? | Was appropriate statistical analysis used? | Risk of bias |
|--------------------------|--------------------------------------------------|--------------------------------------------------------|--------------------------------------------------------|--------------------------------------------------------------------------|--------------------------------------|----------------------------------------------------------|---------------------------------------------------------|--------------------------------------------|--------------|
| Abadie [21]              | Yes                                              | Yes                                                    | Yes                                                    | Yes                                                                      | No                                   | No                                                       | Yes                                                     | No                                         | Low          |
| Aparci [22]              | Yes                                              | Yes                                                    | Yes                                                    | Yes                                                                      | No                                   | No                                                       | Yes                                                     | No                                         | Low          |
| Ju [23]                  | Yes                                              | Yes                                                    | Yes                                                    | Yes                                                                      | No                                   | No                                                       | Yes                                                     | No                                         | Low          |
| Dawie [24]               | Yes                                              | Yes                                                    | Yes                                                    | Yes                                                                      | No                                   | No                                                       | Yes                                                     | No                                         | Low          |
| Ertekin [25]             | Yes                                              | Yes                                                    | Yes                                                    | Yes                                                                      | No                                   | No                                                       | Yes                                                     | No                                         | Low          |
| Patil [26]               | Yes                                              | Yes                                                    | Yes                                                    | Yes                                                                      | No                                   | No                                                       | Yes                                                     | No                                         | Low          |
| Gurumurthy [11]          | Yes                                              | Yes                                                    | Yes                                                    | Yes                                                                      | No                                   | No                                                       | Yes                                                     | No                                         | Low          |
| Bayr [27]                | Yes                                              | Yes                                                    | Yes                                                    | Yes                                                                      | No                                   | No                                                       | Yes                                                     | No                                         | Low          |
| Mehta [28]               | Yes                                              | Yes                                                    | Yes                                                    | Yes                                                                      | No                                   | No                                                       | Yes                                                     | No                                         | Low          |
| Akgol [29]               | Yes                                              | Yes                                                    | Yes                                                    | Yes                                                                      | No                                   | No                                                       | Yes                                                     | No                                         | Low          |
| Mishra [30]              | Yes                                              | Yes                                                    | Yes                                                    | Yes                                                                      | No                                   | No                                                       | Yes                                                     | No                                         | Low          |
| Demir [31]               | Yes                                              | Yes                                                    | Yes                                                    | Yes                                                                      | No                                   | No                                                       | Yes                                                     | No                                         | Low          |
| Gholikhani-Darbroud [32] | Yes                                              | Yes                                                    | Yes                                                    | Yes                                                                      | No                                   | No                                                       | Yes                                                     | No                                         | Low          |
| Mojibi [33]              | Yes                                              | Yes                                                    | Yes                                                    | Yes                                                                      | No                                   | No                                                       | Yes                                                     | No                                         | Low          |
| Choudhury [34]           | Yes                                              | Yes                                                    | Yes                                                    | Yes                                                                      | No                                   | No                                                       | Yes                                                     | No                                         | Low          |
| Yang [35]                | Yes                                              | Yes                                                    | Yes                                                    | Yes                                                                      | Yes                                  | Yes                                                      | Yes                                                     | Yes                                        | Low          |
| Aladag [36]              | Yes                                              | Yes                                                    | Yes                                                    | Yes                                                                      | No                                   | No                                                       | Yes                                                     | No                                         | Low          |
| Ozbicer [37]             | Yes                                              | Yes                                                    | Yes                                                    | Yes                                                                      | No                                   | No                                                       | Yes                                                     | No                                         | Low          |
